# Supplementary material
Source: MDPI journal article supplement (https://www.mdpi.com/search?q=scipharm-76-00743)

## Supporting Information to

### Phenolics as Chemosystematic Markers in and for the Genus *Crepis* (Asteraceae, Cichorieae)

Christian ZIDORN \*, Birthe SCHUBERT, Hermann STUPPNER

Published in Sci Pharm. 2008; 76: 743–750

doi:10.3797/scipharm.0810-25

Available from: <http://dx.doi.org/10.3797/scipharm.0810-25>

© Zidorn et al; licensee Österreichische Apotheker-Verlagsgesellschaft m. b. H., Vienna, Austria.

This is an Open Access article distributed under the terms of the Creative Commons Attribution License (<http://creativecommons.org/licenses/by/3.0/>), which permits unrestricted use, distribution, and reproduction in any medium, provided the original work is properly cited.

#### Table of Contents

- Fig. S1. Voucher of *Crepis alpestris* (Jacq.) Tausch
- Fig. S2. Voucher of *Crepis aurea* (L.) Cass.
- Fig. S3a. Voucher of *Crepis biennis* L. (part 1, heavily damaged by insects).
- Fig. S3b. Voucher of *Crepis biennis* L. (part 2, heavily damaged by insects).
- Fig. S4a. Voucher of *Crepis capillaris* (L.) Wallr. (part 1)
- Fig. S4b. Voucher of *Crepis capillaris* (L.) Wallr. (part 2)
- Fig. S5. Voucher of *Crepis conyzifolia* (Gouan) Kern.
- Fig. S6. Voucher of *Crepis foetida* L.
- Fig. S7. Voucher of *Crepis froelichiana* DC.
- Fig. S8. Voucher of *Crepis jacquinii* Tausch subsp. *kernerii* (Rech.f.) Merxm.
- Fig. S9. Voucher of *Crepis mollis* (Jacq.) Asch.
- Fig. S10. Voucher of *Crepis nemausensis* Gouan
- Fig. S11. Voucher of *Crepis paludosa* (L.) Moench
- Fig. S12. Voucher of *Crepis pygmaea* L.
- Fig. S13. Voucher of *Crepis rhaetica* Hegetschw.
- Fig. S14. Voucher of *Crepis terglouensis* (Hacq.) Kern.
- Fig. S15. Voucher of *Crepis tingitana* Ball

**Fig. S1.** Voucher of *Crepis alpestris* (Jacq.) Tausch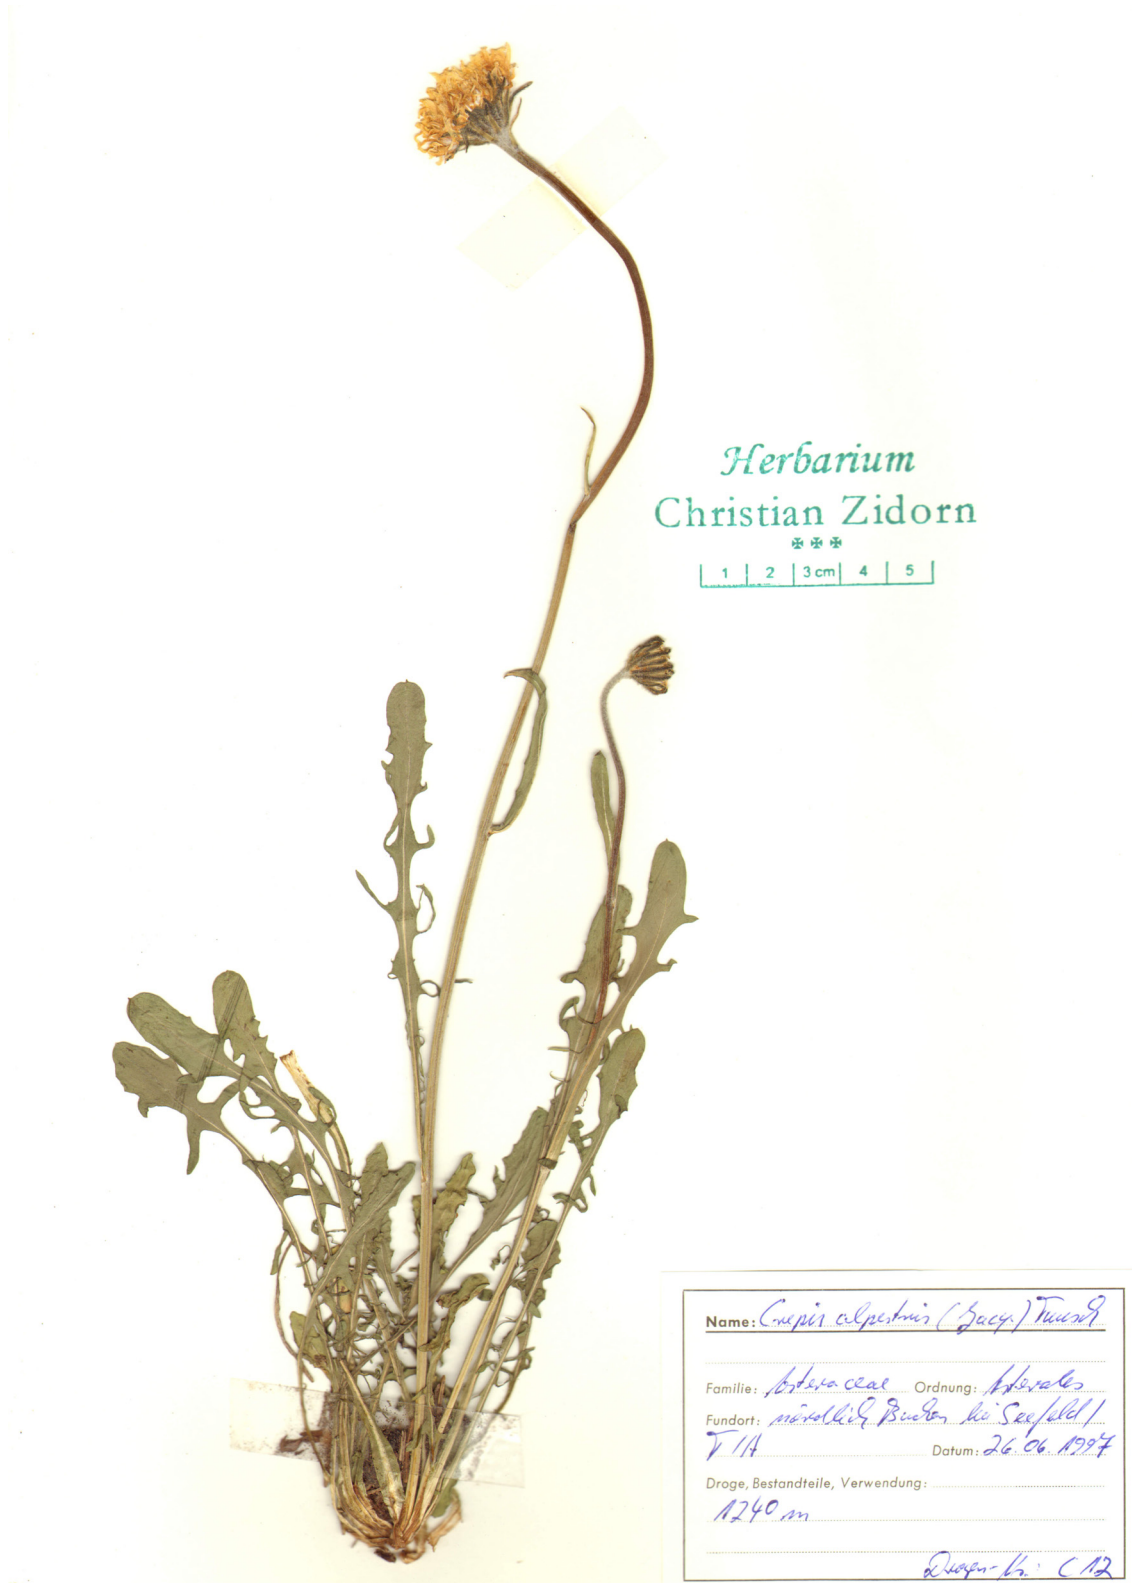

Fig. S2. Voucher of *Crepis aurea* (L.) Cass.

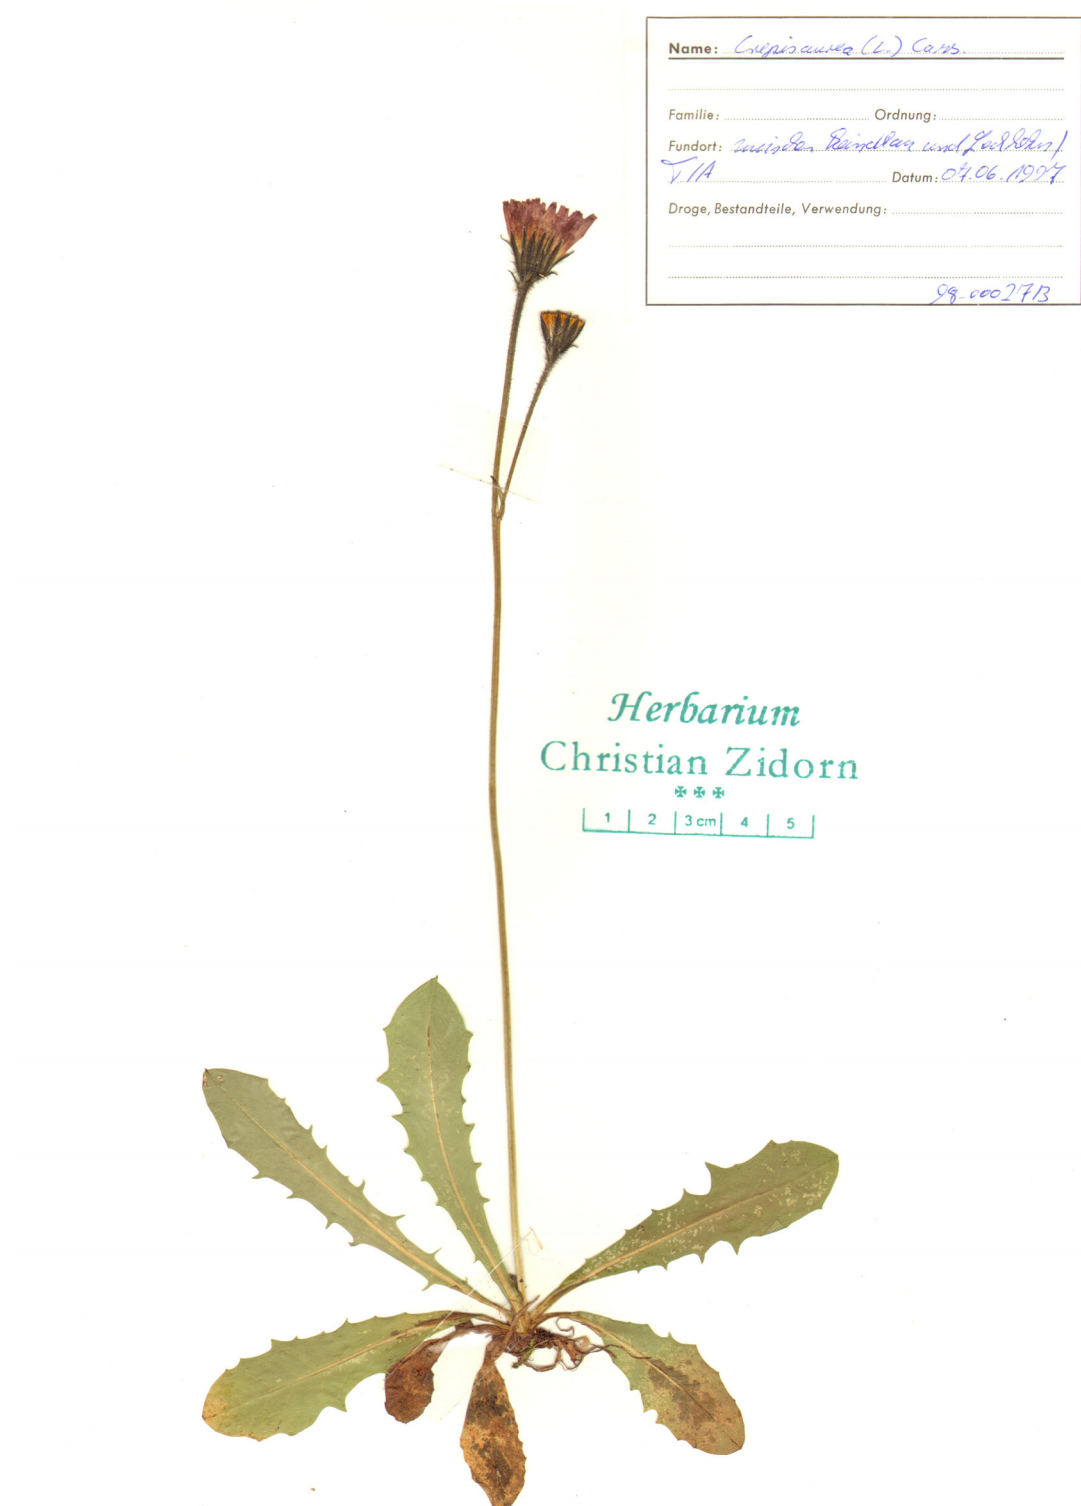

**Fig. S3a.** Voucher of *Crepis biennis* L. (part 1, heavily damaged by insects).

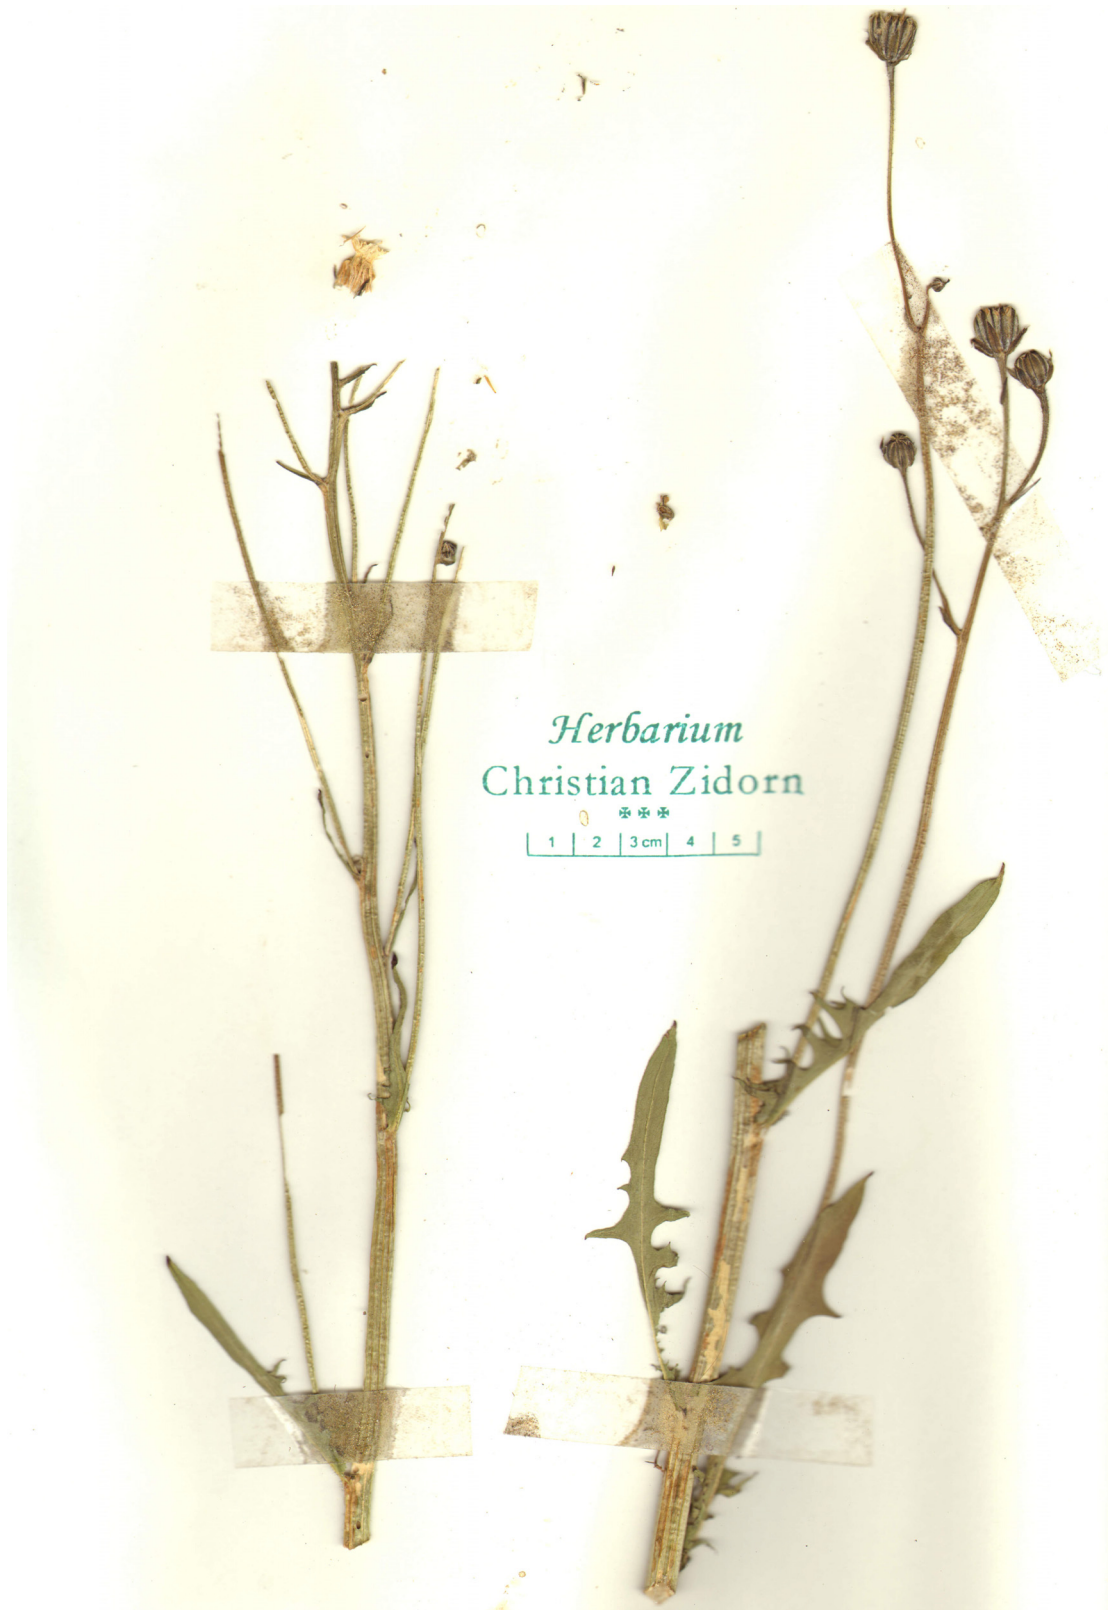



**Fig. S3b.** Voucher of *Crepis biennis* L. (part 2, heavily damaged by insects).

|                                |                          |               |            |
|--------------------------------|--------------------------|---------------|------------|
| Name: <i>Crepis biennis</i> L. |                          |               |            |
| Familie:                       | Asteraceae               | Ordnung:      | Asterales  |
| Fundort:                       | zwischen Mühlau und Arzl |               |            |
| Bezirk:                        | Innsbruck-Stadt          | Land:         | Tirol      |
|                                |                          | Staat:        | Österreich |
| Höhe ü. NN:                    | 600 m                    | Exp.:         |            |
| TK:                            |                          | BMN:          |            |
| Datum:                         | 10.05.1997               | leg.:         | Ch. Zidorn |
|                                |                          | det.:         | Ch. Zidorn |
| Herbarnummer:                  | 971127m                  | Drogennummer: |            |
| Standort:                      | Boden, Gestein:          |               |            |
| Vergesellschaftung:            |                          |               |            |

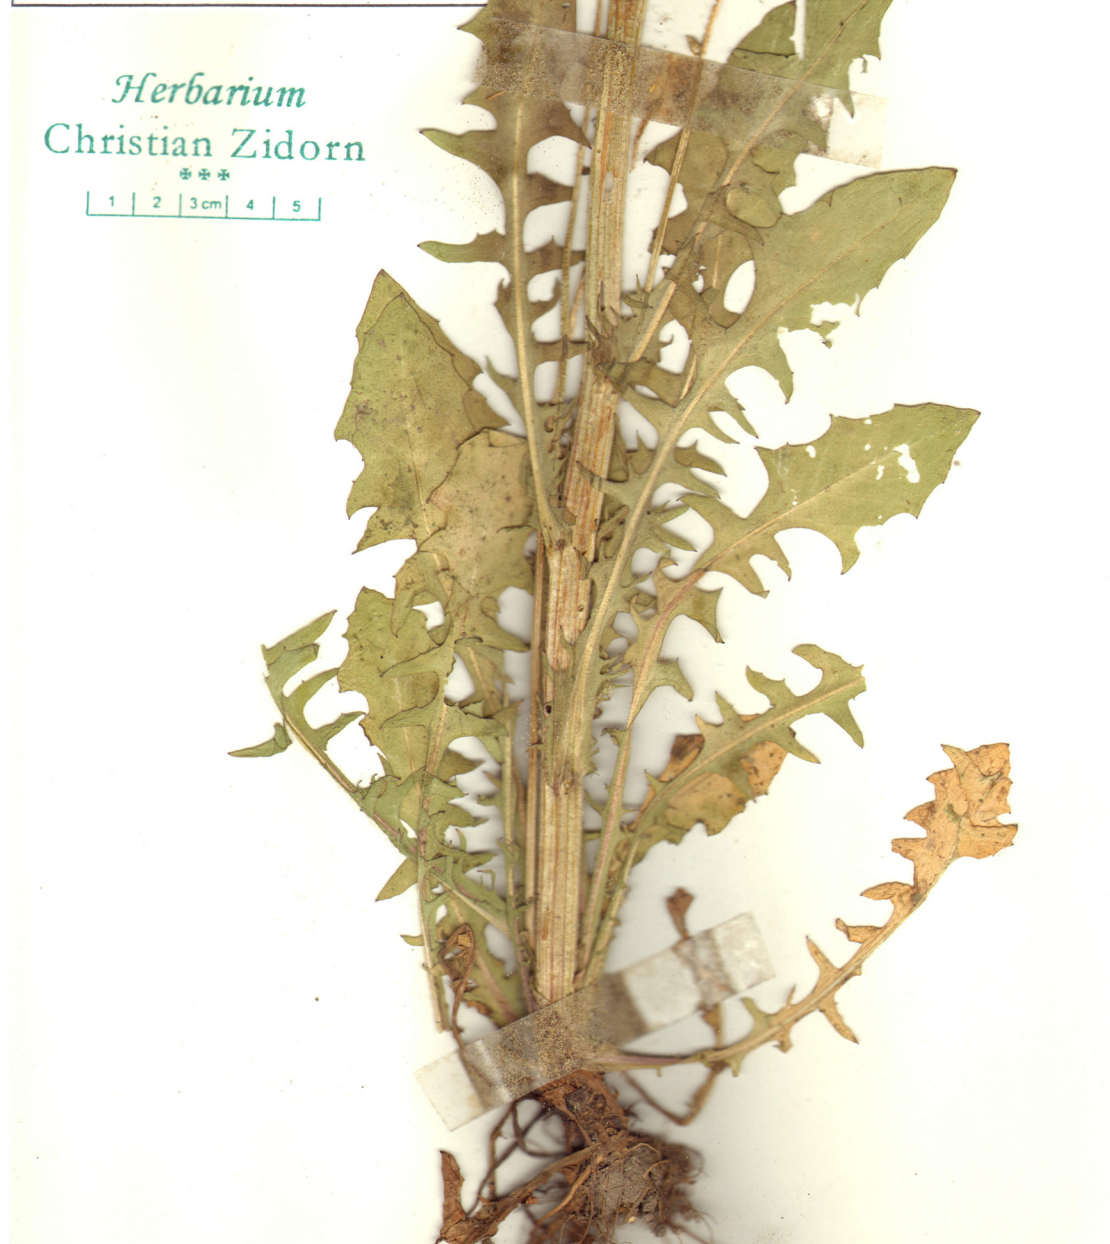

**Fig. S4a.** Voucher of *Crepis capillaris* (L.) Wallr. (part 1)

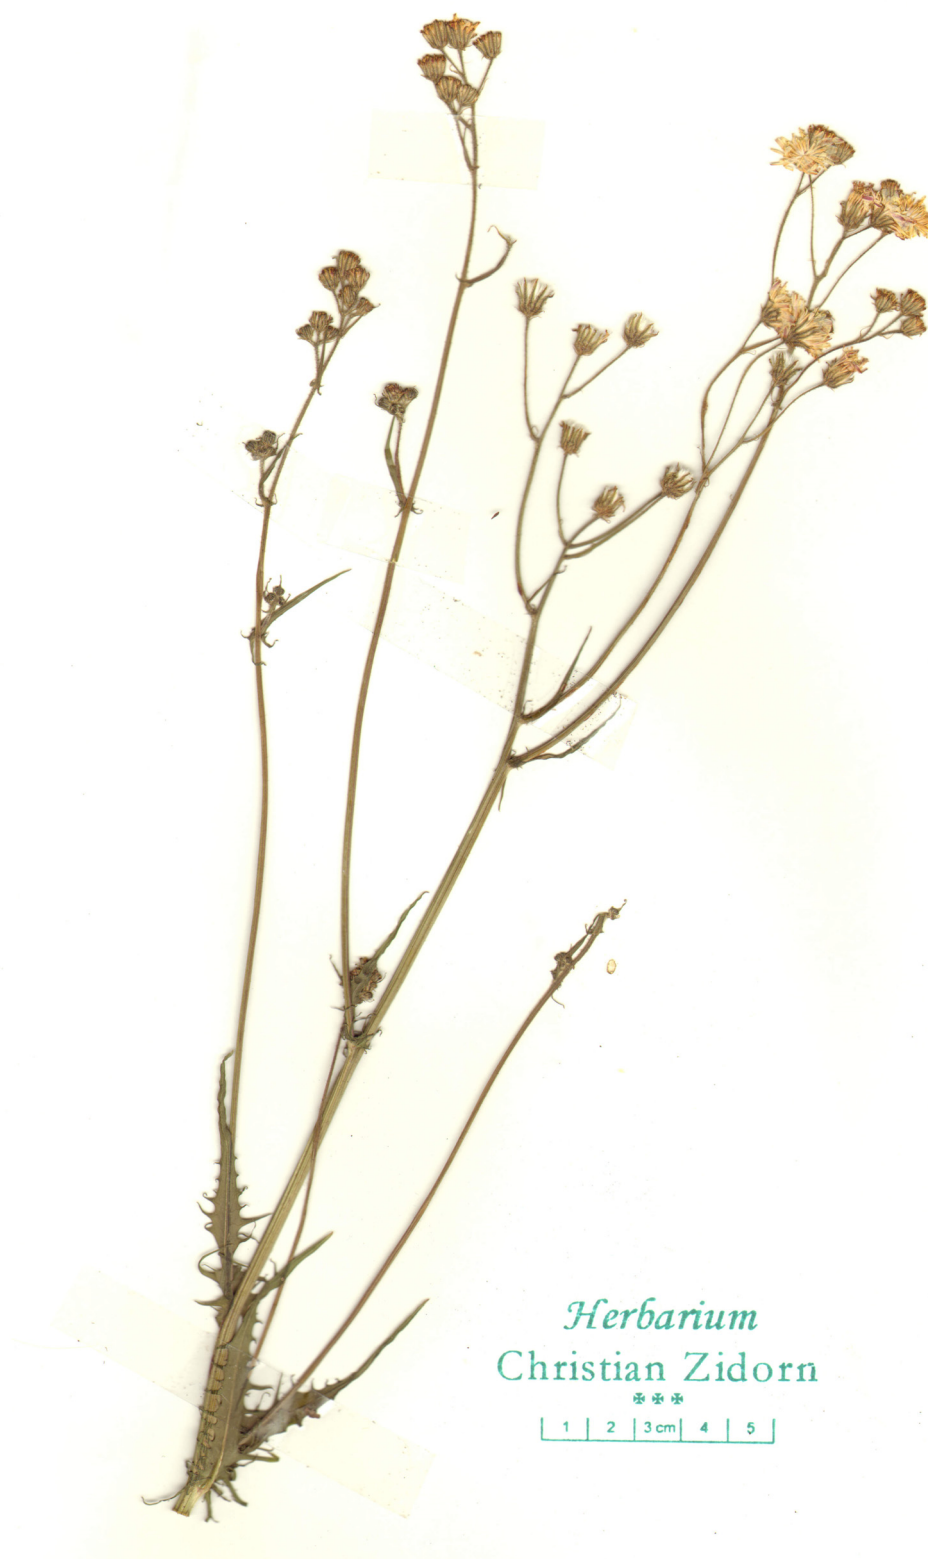

**Fig. S4b.** Voucher of *Crepis capillaris* (L.) Wallr. (part 2)

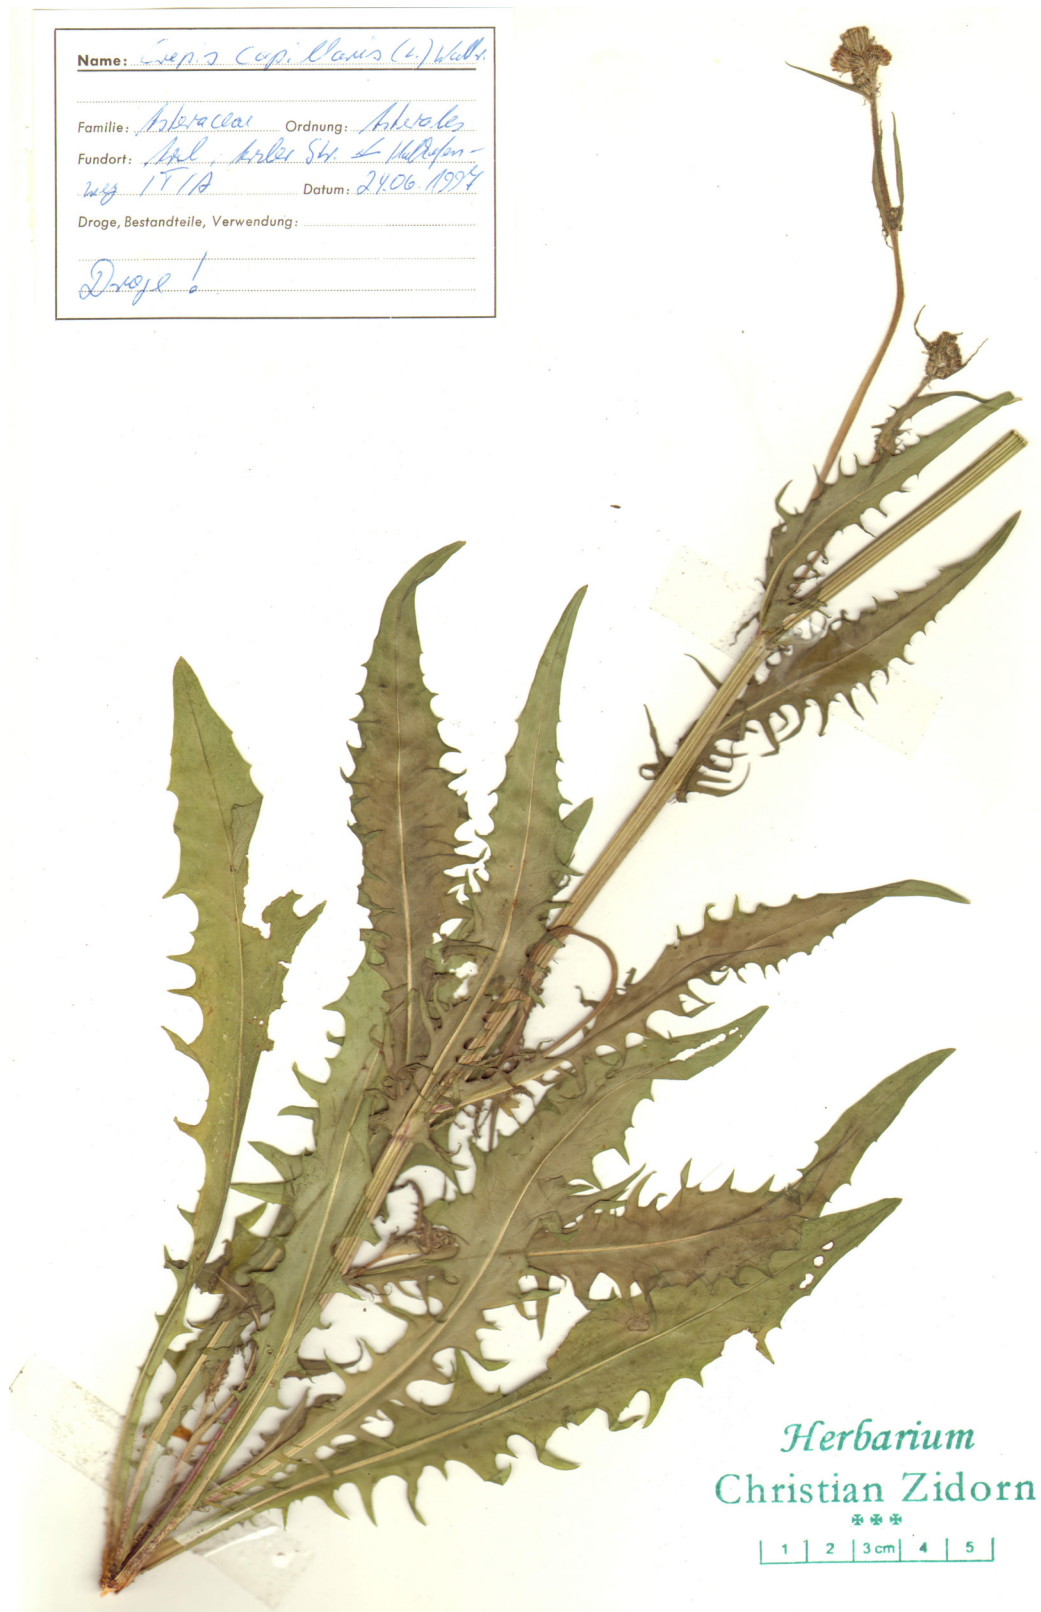



**Fig. S5.** Voucher of *Crepis conyzifolia* (Gouan) Kern.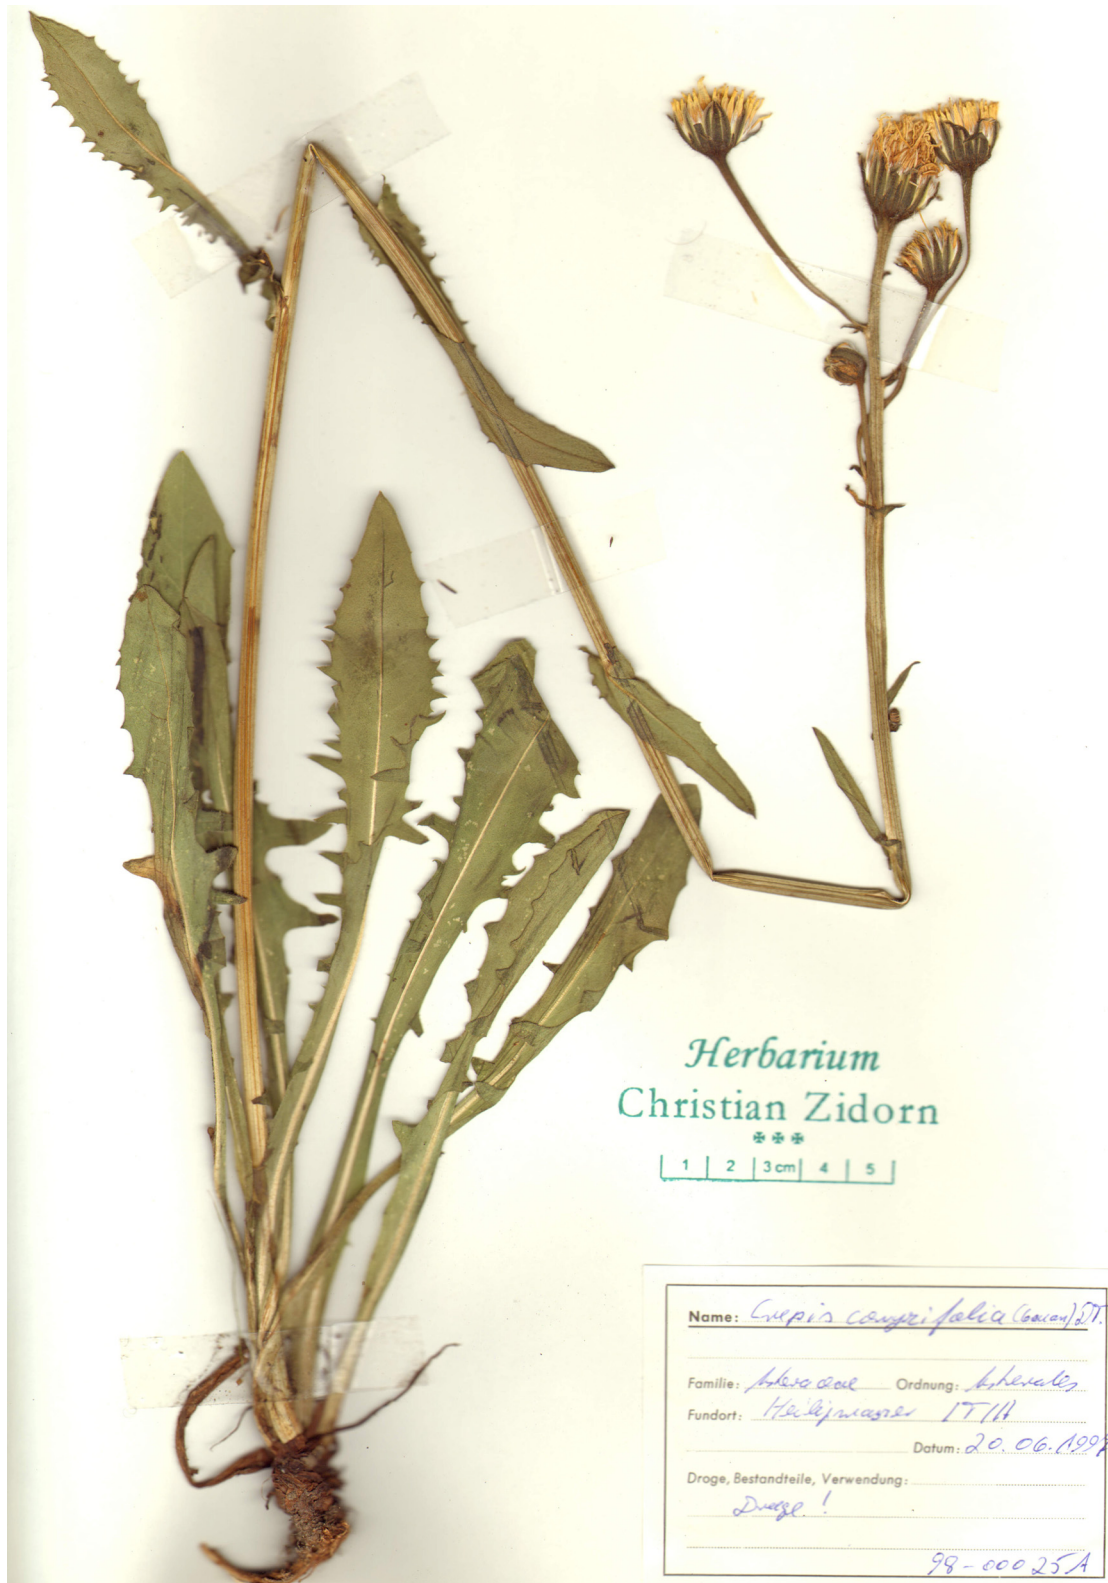

Fig. S6. Voucher of *Crepis foetida* L.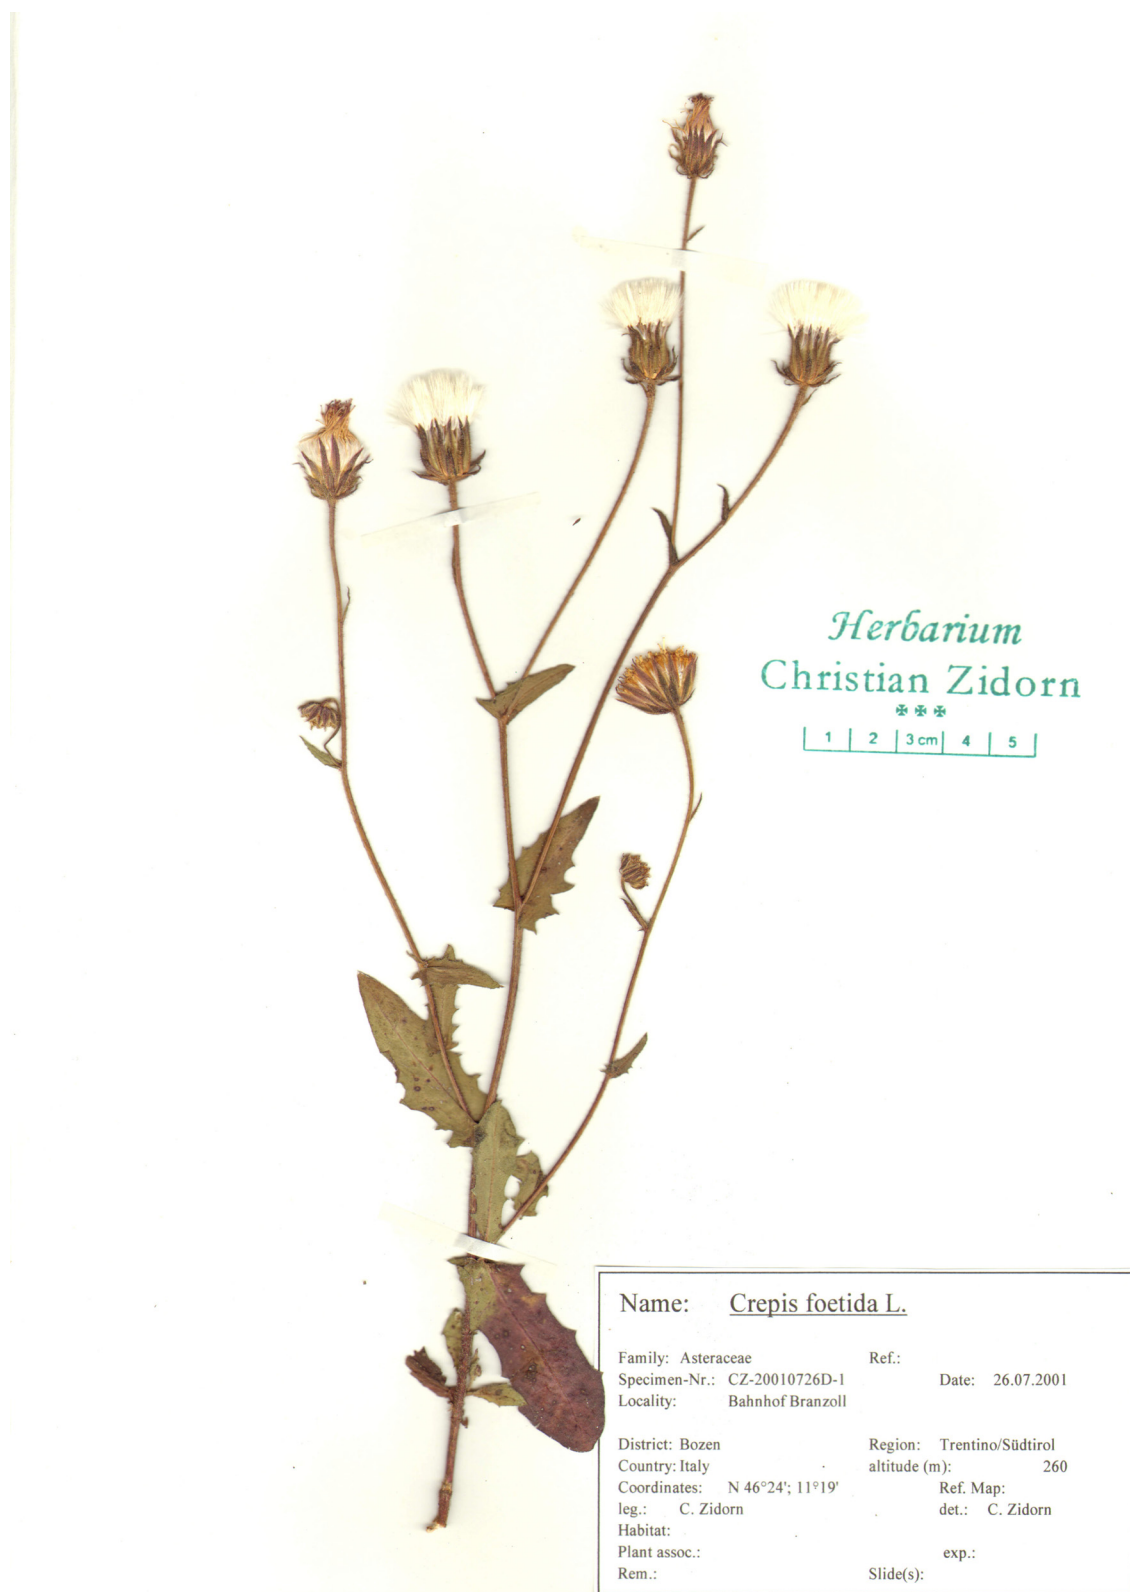



**Fig. S7.** Voucher of *Crepis froelichiana* DC.

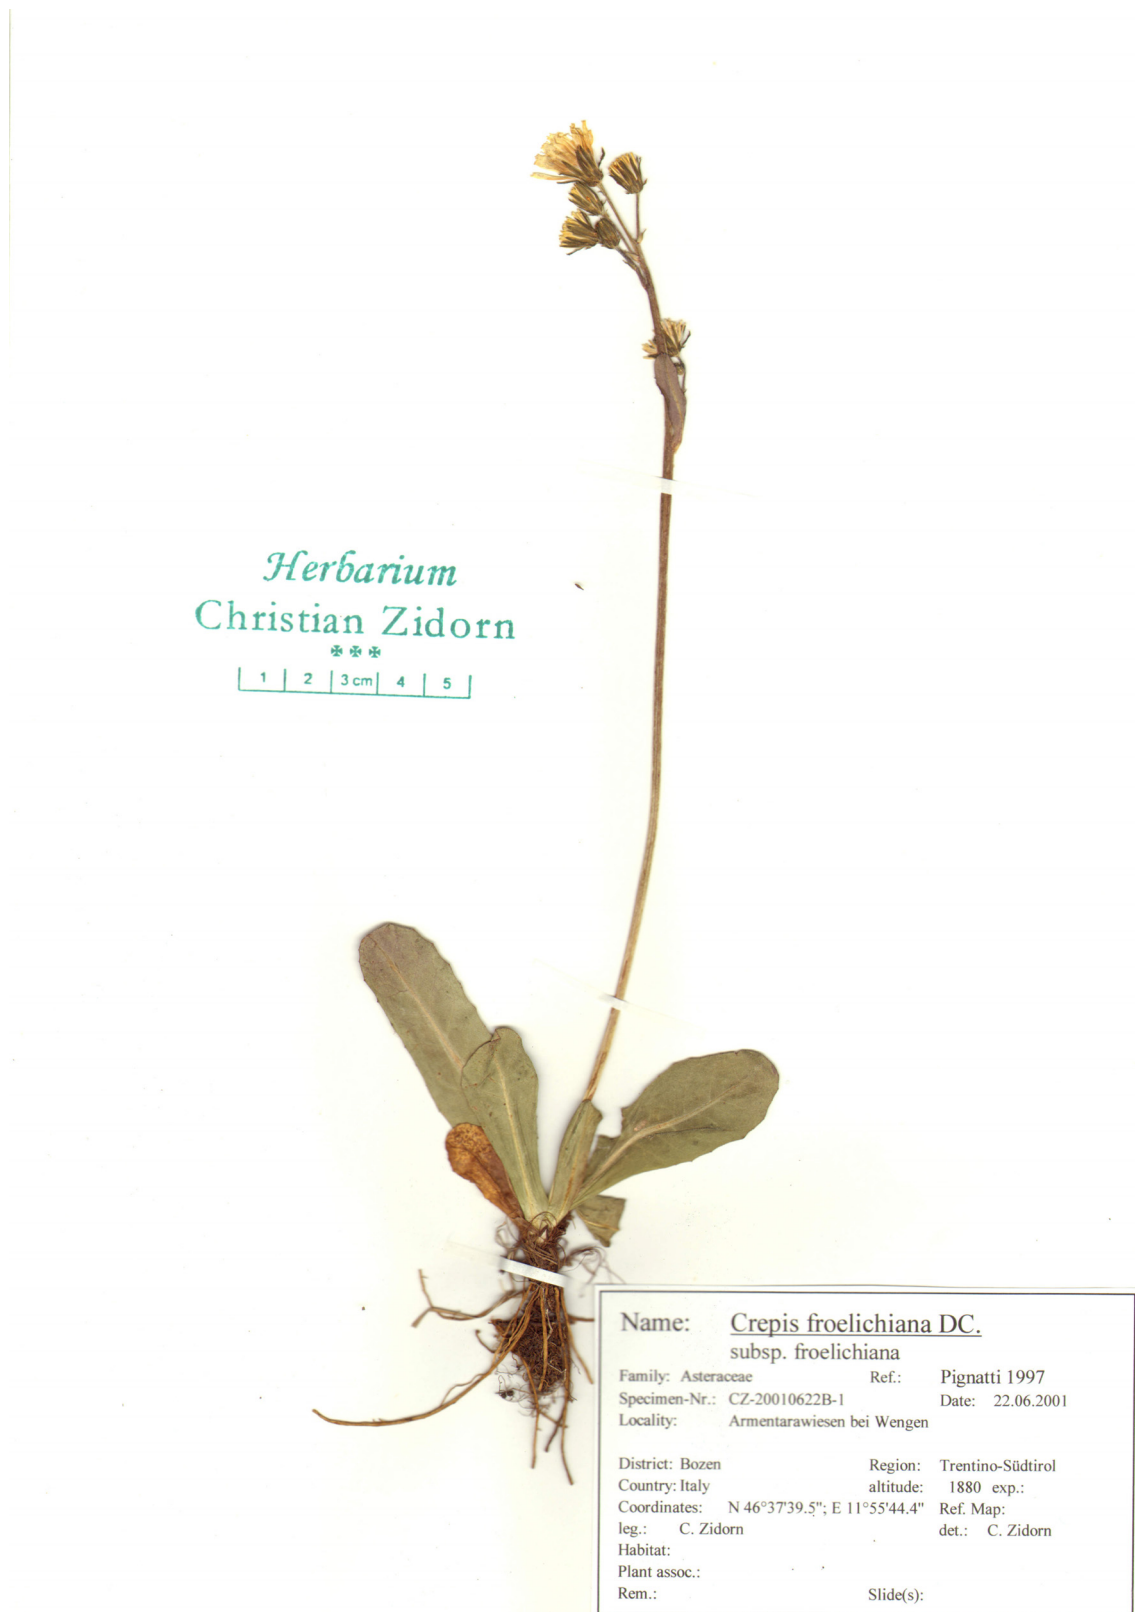

**Fig. S8.** Voucher of *Crepis jacquinii* Tausch subsp. *keneri* (Rech.f.) Merxm.

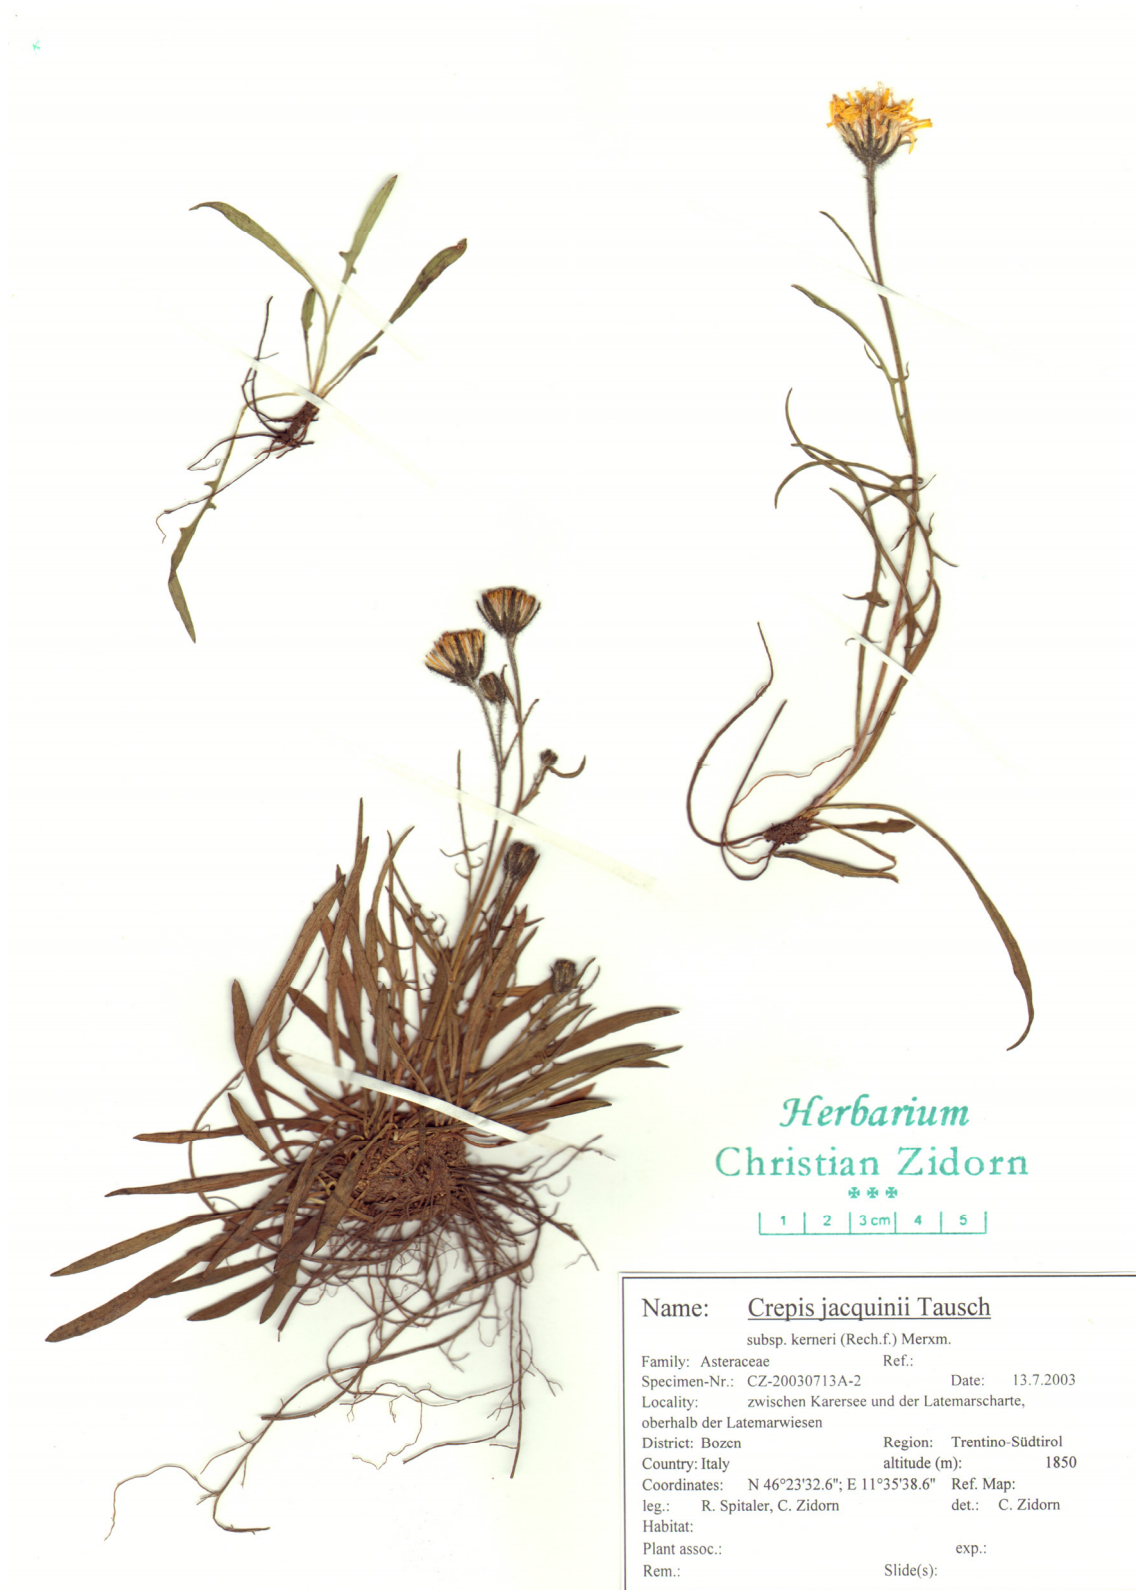

Fig. S9. Voucher of *Crepis mollis* (Jacq.) Asch.

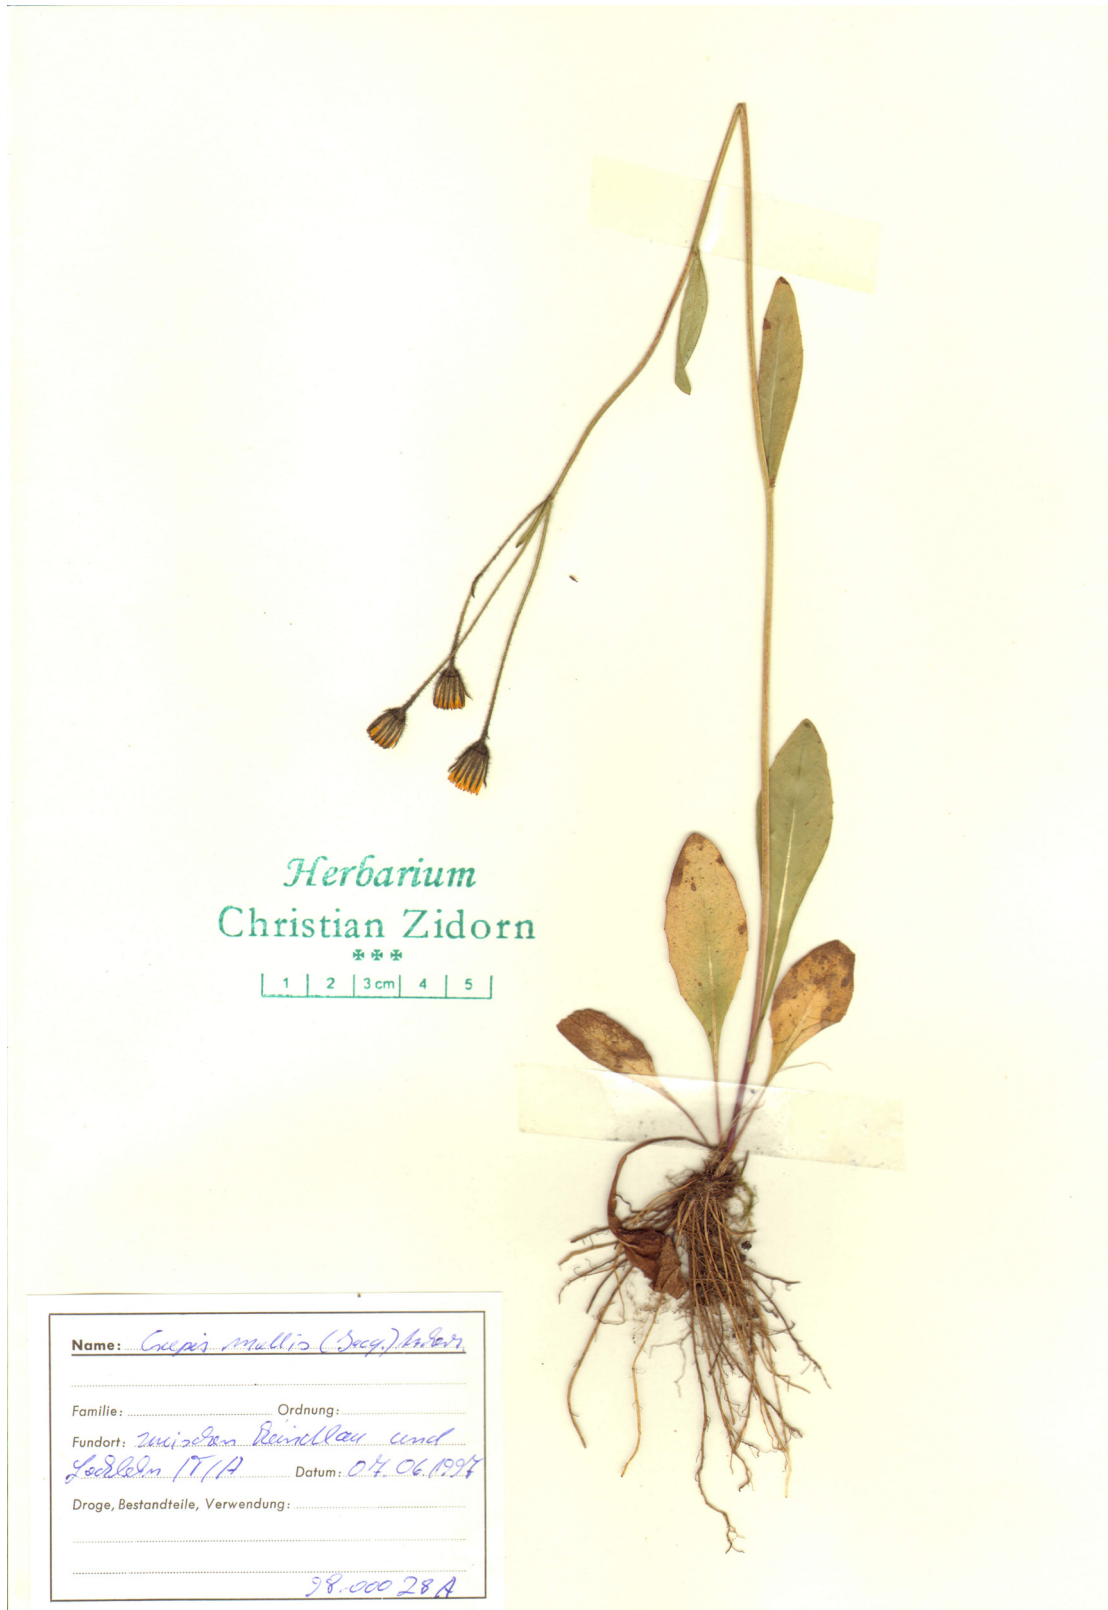

Fig. S10. Voucher of *Crepis nemausensis* Gouan

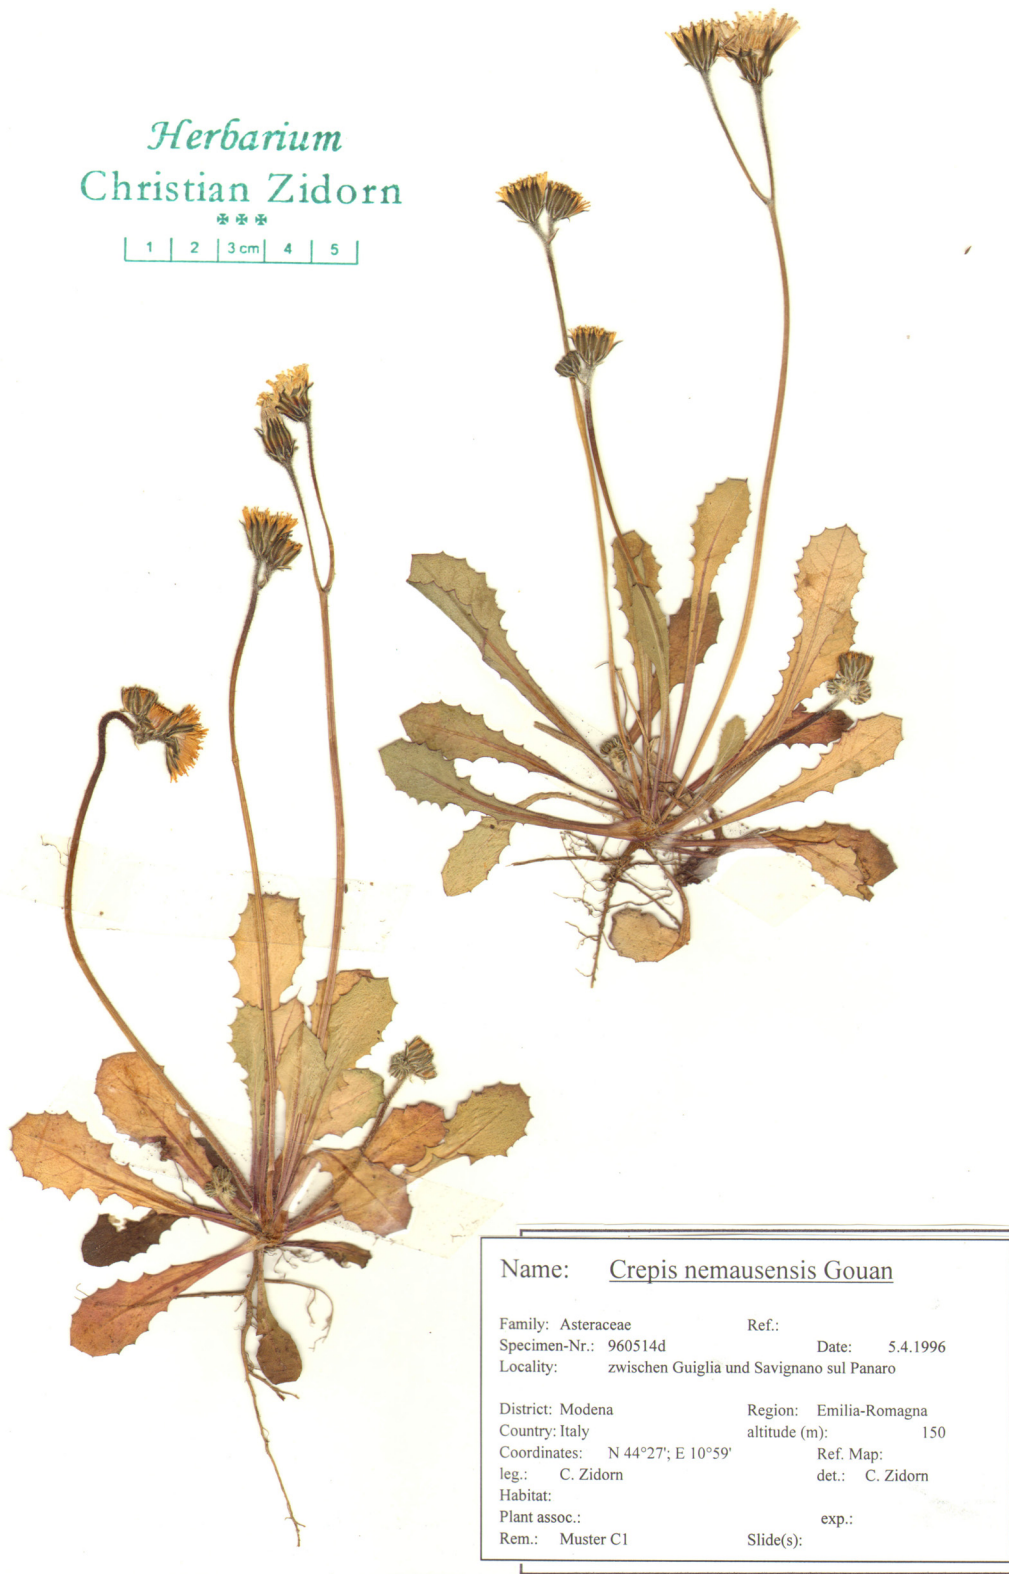

|                                                     |                        |
|-----------------------------------------------------|------------------------|
| Name: <u>Crepis nemausensis</u> Gouan               |                        |
| Family: Asteraceae                                  | Ref.:                  |
| Specimen-Nr.: 960514d                               | Date: 5.4.1996         |
| Locality: zwischen Guiglia und Savignano sul Panaro |                        |
| District: Modena                                    | Region: Emilia-Romagna |
| Country: Italy                                      | altitude (m): 150      |
| Coordinates: N 44°27'; E 10°59'                     | Ref. Map:              |
| leg.: C. Zidorn                                     | det.: C. Zidorn        |
| Habitat:                                            | exp.:                  |
| Plant assoc.:                                       | Slide(s):              |
| Rem.: Muster C1                                     |                        |



Fig. S11. Voucher of *Crepis paludosa* (L.) Moench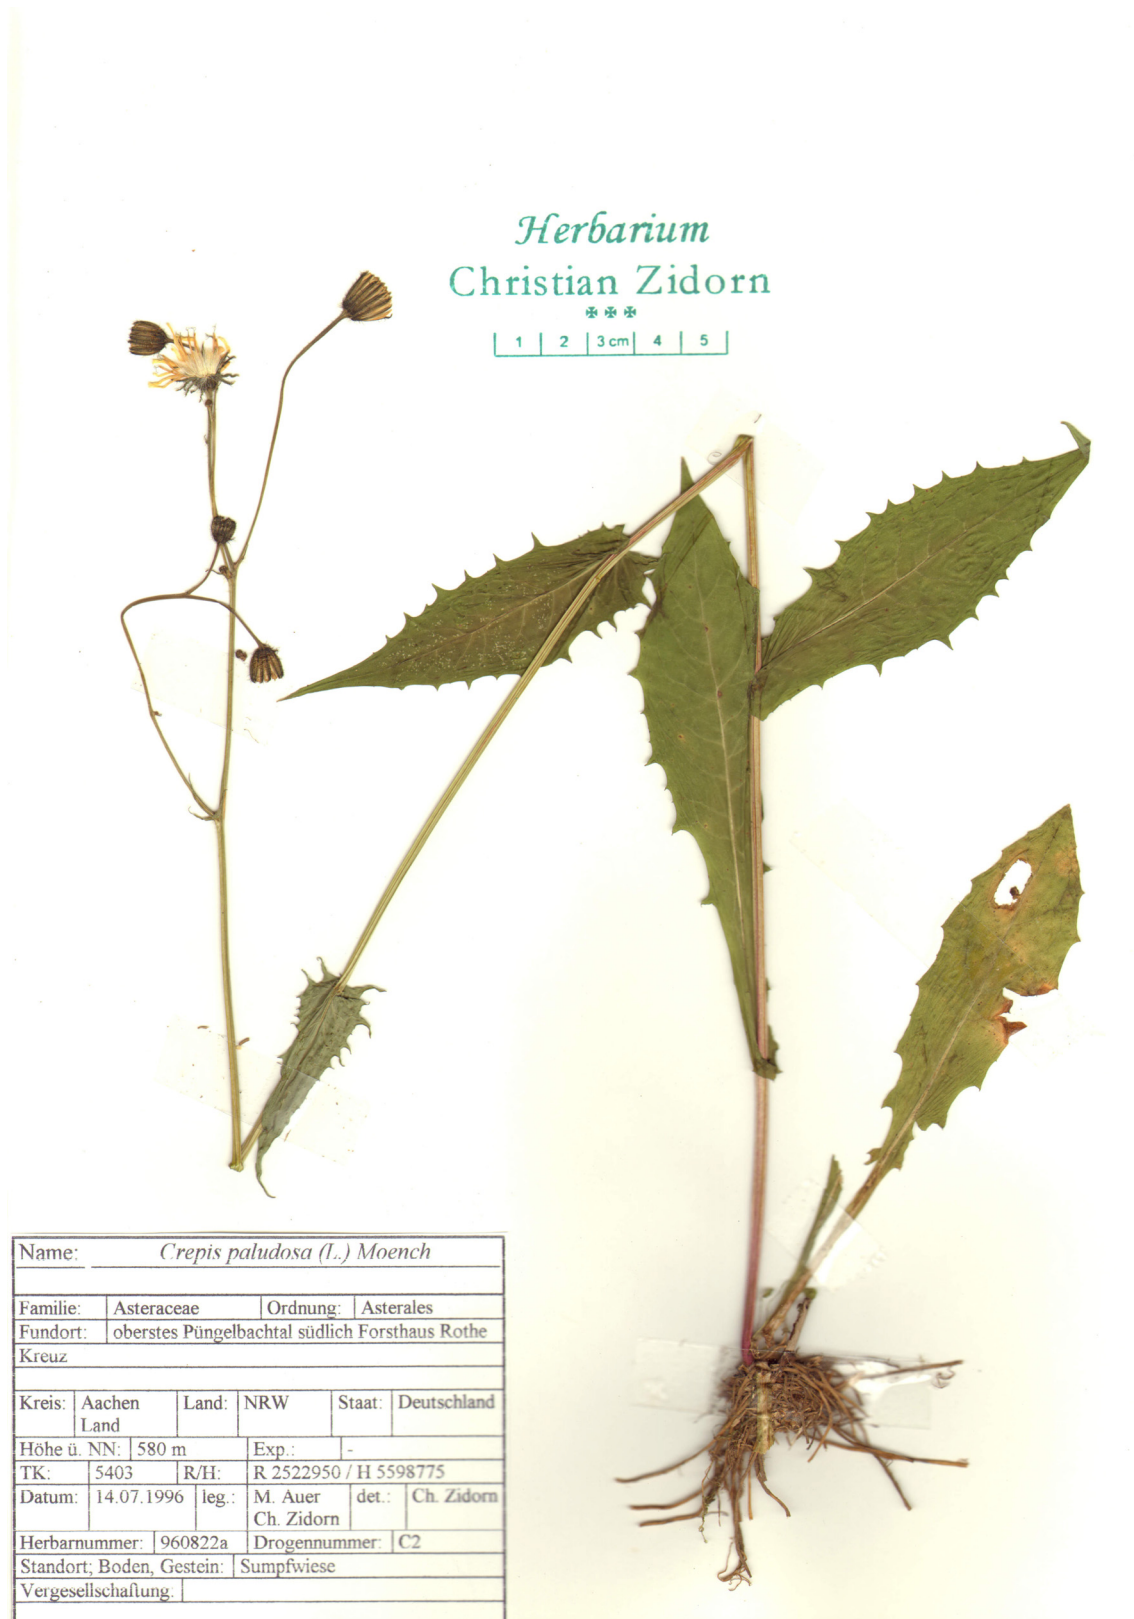



Fig. S12. Voucher of *Crepis pygmaea* L.

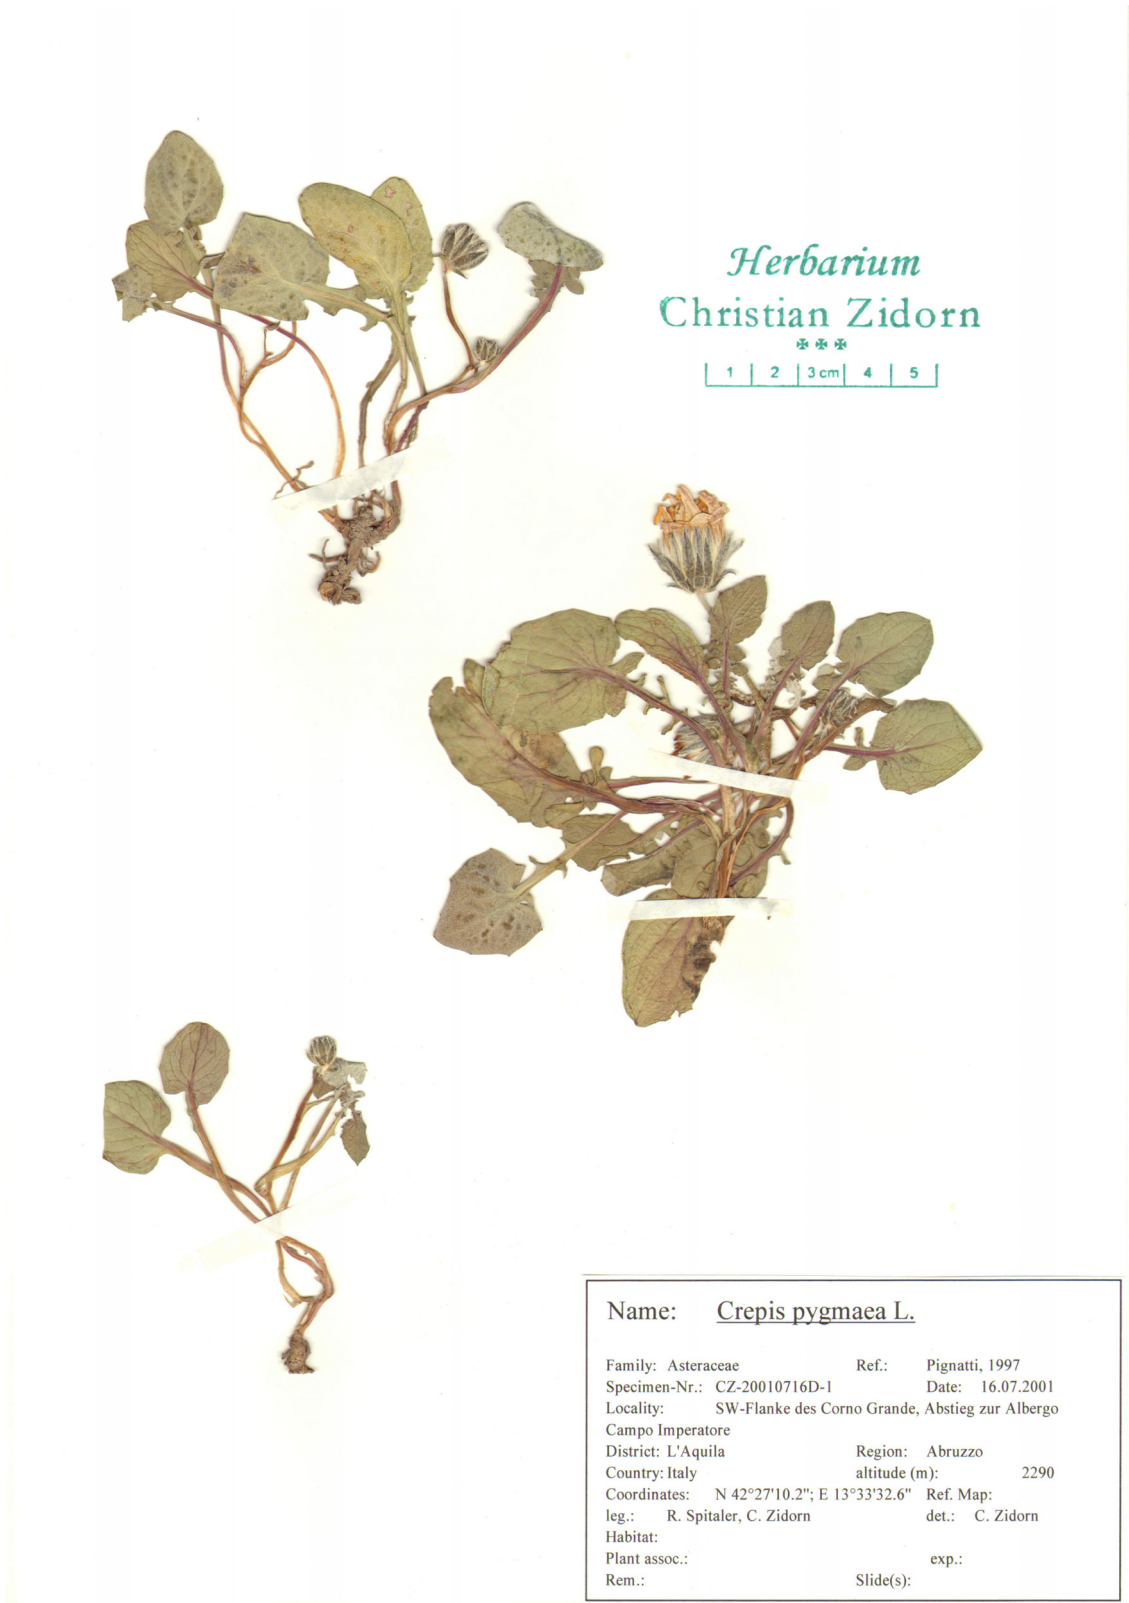

Fig. S13. Voucher of *Crepis rhaetica* Hegetschw.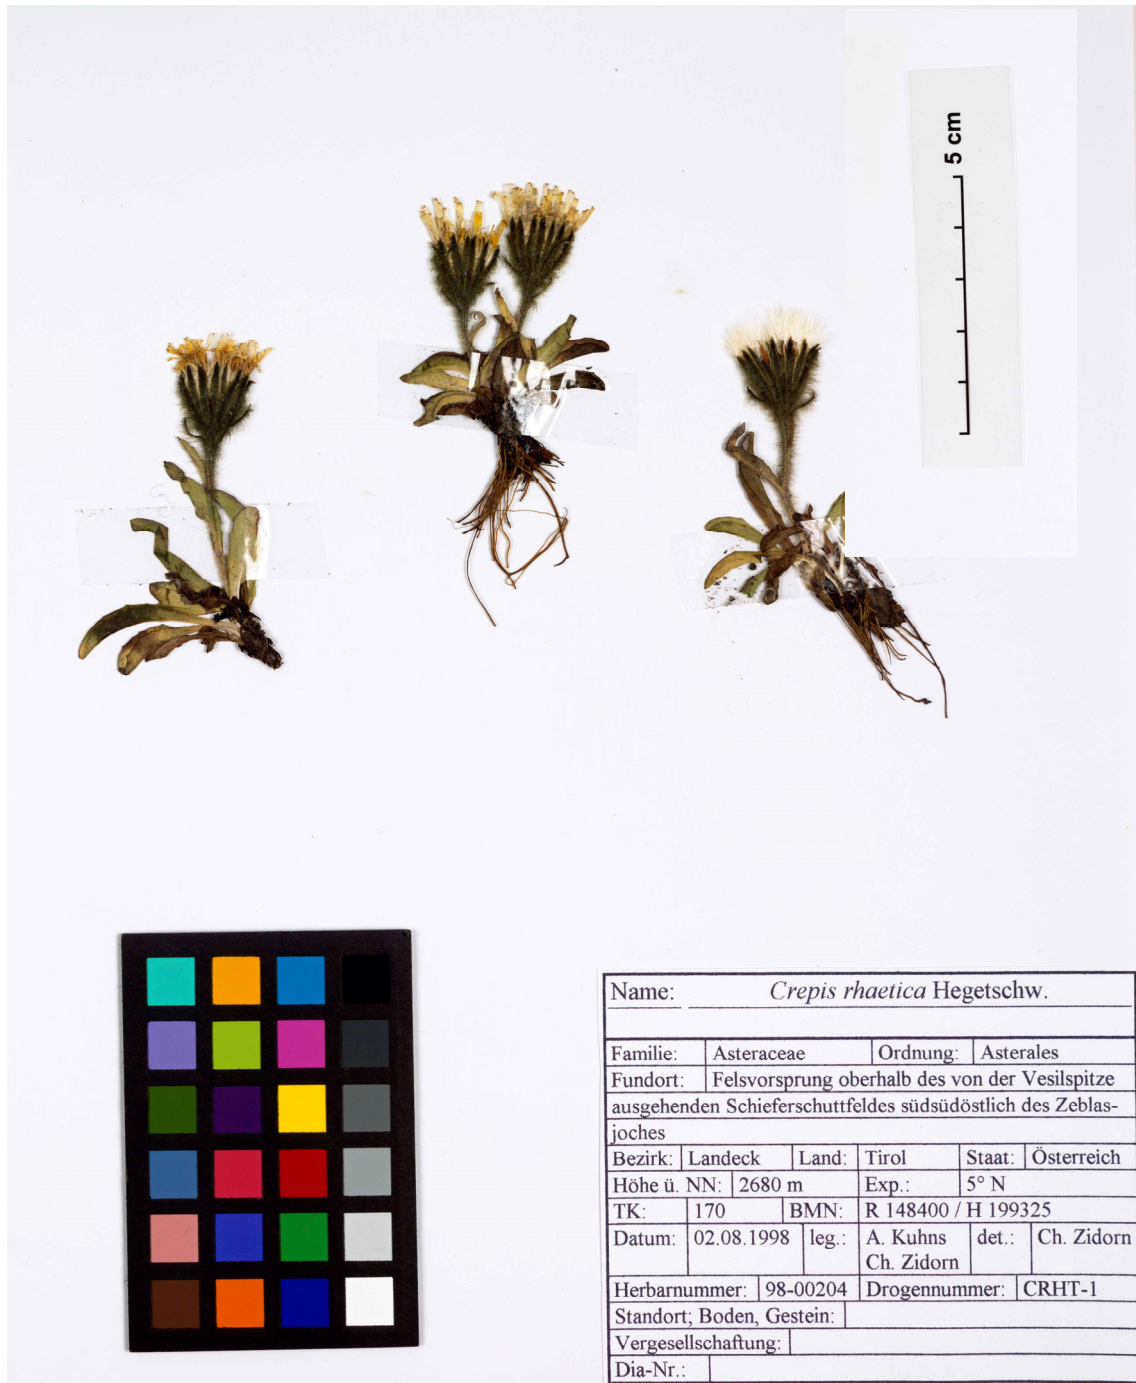

**Fig. S14.** Voucher of *Crepis terglouensis* (Hacq.) Kern.

*Herbarium*  
Christian Zidorn  
\*\*\*  
1 | 2 | 3 cm | 4 | 5

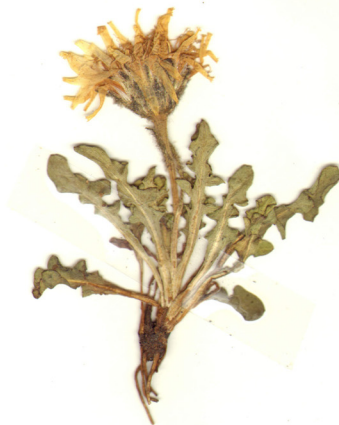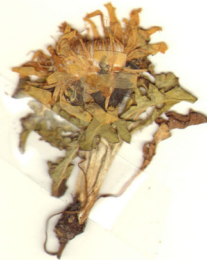

|                           |                                                 |                                          |                        |
|---------------------------|-------------------------------------------------|------------------------------------------|------------------------|
| Name:                     |                                                 | <i>Crepis terglouensis</i> (Hacq.) Kern. |                        |
| Familie:                  | Asteraceae                                      | Ordnung:                                 | Asterales              |
| Fundort:                  | Albulapaß nördlich des Sees östlich der Paßhöhe |                                          |                        |
| Kanton:                   |                                                 | Graubünden                               | Staat: Schweiz         |
| Höhe ü. NN:               | 2400 m                                          | Exp.:                                    | 20° SW                 |
| TK:                       |                                                 | R/H:                                     |                        |
| Datum:                    | 15.08.1997                                      | leg.:                                    | A. Kuhns<br>Ch. Zidorn |
|                           |                                                 | det.:                                    | Ch. Zidorn             |
| Herbarnummer:             | 970916b                                         | Drogennummer:                            | C16                    |
| Standort, Boden, Gestein: |                                                 |                                          |                        |
| Vergesellschaftung:       |                                                 |                                          |                        |

**Fig. S15.** Voucher of *Crepis tingitana* Ball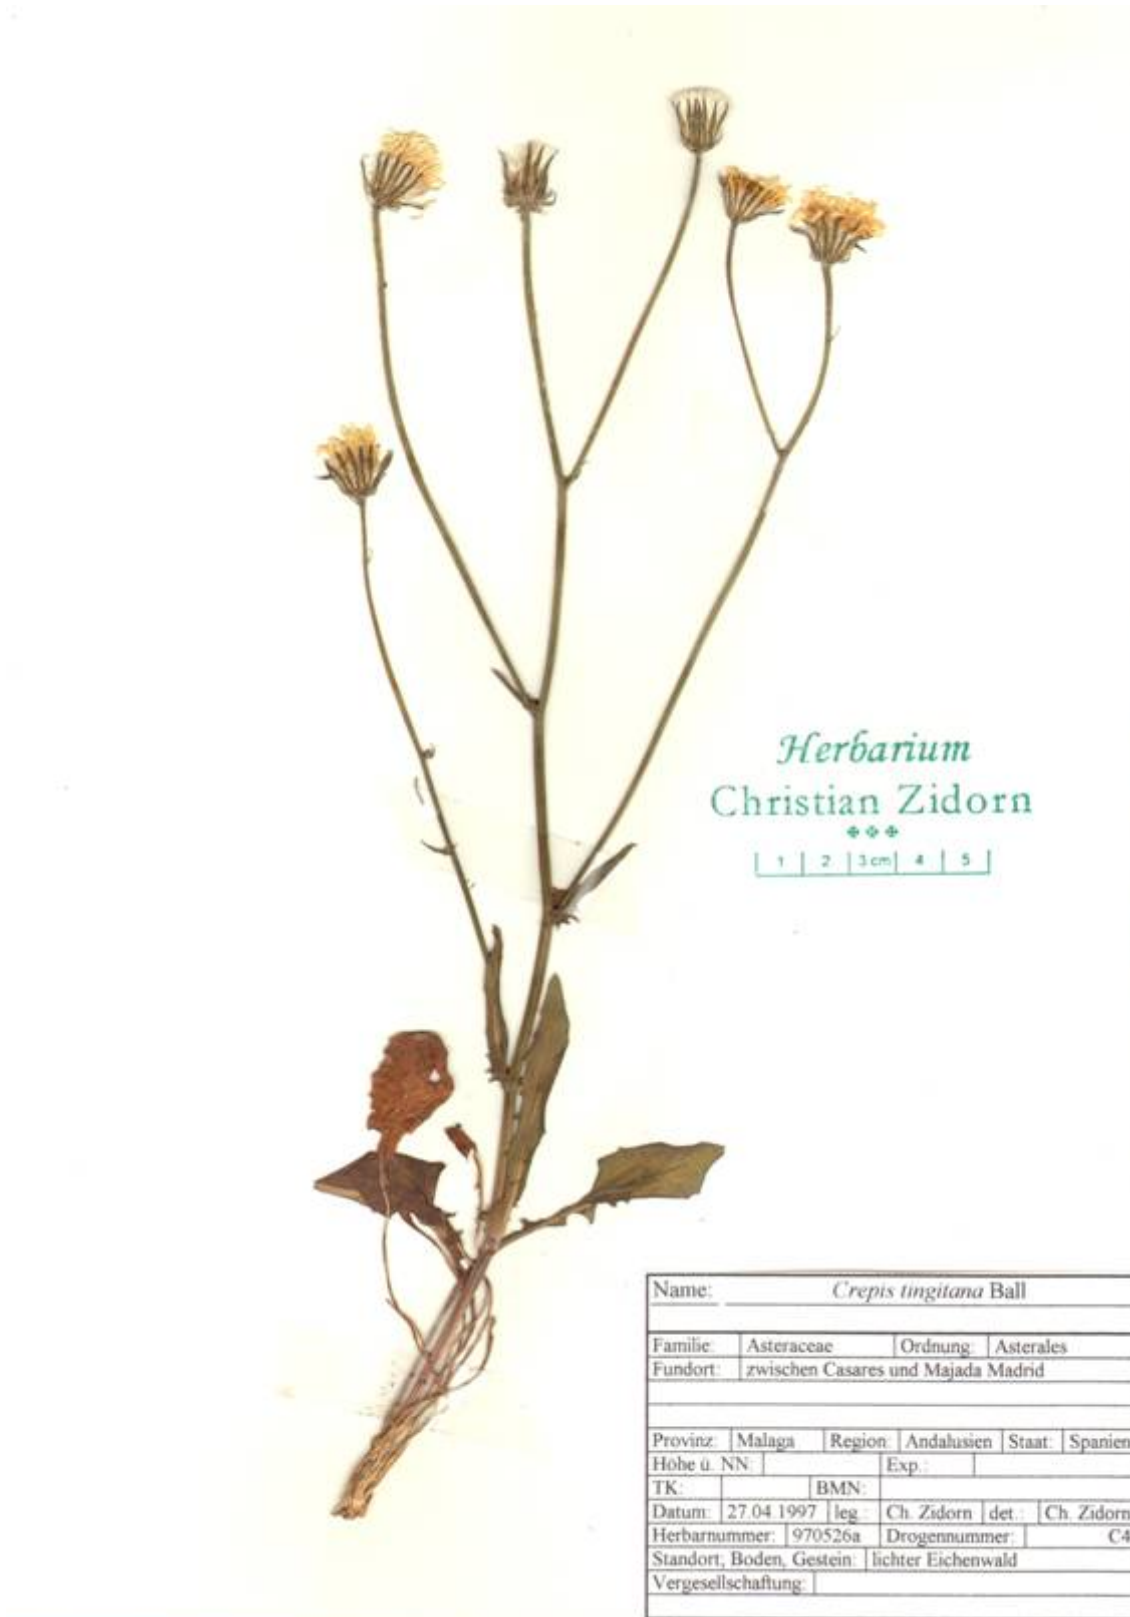

Supplement: s001 [file scipharm-76-00743-s001.pdf]
